1  
2  
3  
4  
5  
6  
7  
8  
9  
10  
11  
12  
13  
14  
15  
16  
17  
18  
19

## **Retinal Plasticity: Functional Recovery after Bipolar Cell Loss in the Oxygen Induced Retinopathy Model**

BioRxiv submission Version 12-12-2019

K.P. Mitton<sup>1</sup>, M. Deshpande<sup>1</sup>, S.C. Wong<sup>1,3</sup>, E. Guzman<sup>1</sup>, M. Cheng<sup>1</sup>, W. Dailey<sup>1</sup>, R. Schunemann<sup>1,4</sup>, M. Trese<sup>1,2</sup>, K. Dreiser<sup>1,2</sup>

1 Eye Research Institute - Pediatric Retinal Research Lab, Oakland University, Rochester, MI

2 Associated Retinal Consultants, Novi, MI.

3 Currently, Moorsfields Eye Hospital, Great Ormond Street Hospital for Children, and Royal Free Hospital, London, United Kingdom

4 Currently, Oftalmologica, Joinville, Santa Catarina, Brazil

Corresponding authors: Ken Mitton, [mitton@oakland.edu](mailto:mitton@oakland.edu), 248-370-2079. Kimberly Dreiser [kdreiser@arcpc.net](mailto:kdreiser@arcpc.net)

## ABSTRACT

20  
21  
22  
23  
24  
25  
26  
27  
28  
29  
30  
31  
32  
33  
34  
35  
36  
37  
38  
39  
40  
41  
42

**Purpose:** Bipolar cells can perish during inner retinal ischemia resulting from disruption of the inner retinal microvasculature. Can surviving inner retinal neurons recover and integrate into the functional network after ischemic damage? Using the mouse oxygen induced retinopathy (OIR) model, we applied focal-ERG to determine if B-wave recovery occurs after ischemic bipolar cell death after revascularization.

**Methods:** The OIR model was used to generate regions of inner retinal neuron loss in B6.Cg-Tg<sup>Thy1-YFP</sup> mice. Using image-guided focal-ERG, the dark-adapted mixed rod-cone light response was compared using stimulation of small circular (0.27 mm diameter) target areas located in the central retinas of the same eyes (OIR and control). The same areas of the same retinas were followed over three ages after revascularization (P21, P28 and P42).

**Results:** There was a minimal effect on the photoreceptor-derived A-wave amplitude in the central damaged regions. B-wave amplitudes were almost absent in these damaged central regions at age P21, and progressively recovered through ages P28 to P42. The magnitude of the recovered B-wave amplitude by P42 remained less than the normal control retina (room air), but did show oscillatory potentials.

**Conclusions:** Recovery of retinal functionality, a neural plasticity, was detected in the central damaged regions of the mouse OIR model after the initial loss of bipolar cells and revascularization of these zones. These results suggest that any treatments that would enhance the overall survival of inner retinal neurons result in a significant improvement in neural function after any surviving neurons establish connectivity.

43  
44  
45  
46  
47  
48  
49  
50  
51  
52  
53  
54  
55  
56  
57  
58  
59  
60  
61  
62  
63  
64  
65  
66  
67  
68  
69  
70  
71  
72  
73

## INTRODUCTION

While the Human retina is routinely monitored with non-invasive methods, there is a growing awareness that combining multiple imaging modes and targeted functional testing can provide a more complete understanding of both development and regional pathophysiology. In various Human retinal diseases, the initial pathology and the progress of retinal changes are rarely uniform throughout the entire retina area. There are often profound differences in both the radial direction and distance from the disc, or between the central and peripheral retina. Useful disease research models, such as the oxygen induced retinopathy (OIR) model, or testing of sub-retinal injections (genes/cells) would also benefit from the ability to compare different retinal areas within the same eye [1-4]. In this report, we describe the application of non-invasive retinal imaging, combined with focal-ERG, to explore the plasticity of the inner neural retina subsequent to the loss of inner retinal neurons, bipolar cells, after ischemia in the mouse OIR model.

In humans, damage to the post-photoreceptor sensitivity is common in retinopathy of prematurity (ROP) patients depending on the severity of disease (Fulton et al, 2009)[5]. Both photoreceptor sensitivity and post-photoreceptor response are diminished more in severe ROP compared to mild ROP patients, with cone responses less affected than rod responses (Fulton 2008)[6]. Rod photoreceptor function and post-photoreceptor function is also diminished in rat OIR models (Akula et al 2007) [7] (Fulton, Akula et al 2009) [8] More recent studies in humans indicate that some ROP patients likely experience recovery of post-photoreceptor function. This is based on the finding that older patients who were classified as having mild ROP as infants have improved post-photoreceptor function compared to infant mild ROP patients (Harris et al., 2011)[9]. Nakamura et al. (2012) reported an average reduction in the full-field ERG B-wave amplitude from the retinas of OIR mice, consistent with a significant loss of bipolar cells [10]. They also noted a partial recovery of the B-wave amplitude over several weeks post-damage.

Neural retinal maturation and retinal vascular development occurs post-natal in mice. For the oxygen induced retinopathy model, mice are exposed to 75% oxygen for five days, from age P7 to P12. This period starts about the time that the superficial vascular bed is just

74 reaching the peripheral retina, having originated from the optic disc. In the high oxygen  
75 environment the normal development of all three vascular beds is impaired and the  
76 superficial capillary bed degenerates through apoptosis. After five days of 75% oxygen, by  
77 age P12, the central retina is devoid of any capillary beds and thus avascular. Down-  
78 regulation of retinal *Vegf* (Vascular Endothelial Growth Factor) gene expression is a major  
79 factor responsible for this vaso-obliteration mechanism [11]. Upon return to room air (21%  
80 oxygen), this central retinal zone becomes hypoxic and that results in an increased  
81 concentration of VEGFA (vascular endothelial growth factor A) and an aggressive  
82 revascularization of the central retina [12]. This process brings oxygen back to the central  
83 retina by age P21. Until this recovery to normoxia by age P21, bipolar cell loss can be  
84 extensive in the central retina and the thinning of the INL (inner nuclear layer) may be  
85 substantial [13].

86

87 Since full-field ERG stimulates both the more central OIR damaged retina and the  
88 non-damaged peripheral retina, some questions remain regarding the nature of the B-wave  
89 recovery seen in both rat and mouse OIR models. Does post-photoreceptor function recover  
90 in the central damaged zones, or is the recovery of the full-field ERG B-wave simply  
91 originating in the otherwise undamaged peripheral retina? Upon initial OIR damage, are  
92 there regions with little or no post-photoreceptor B-wave response that still have substantial  
93 photoreceptor A-wave response? To answer these questions we employed a novel focal-  
94 ERG system to evaluate the relative function within the central zones of the OIR damaged  
95 retina over several weeks after revascularization.

96

## 97 **METHODS**

98

99 *Animals* - This study was approved by the Oakland University IACUC and complied with  
100 the ARVO Statement for the Use of Animals in Ophthalmic and Vision Research. Mice  
101 expressing YFP (yellow fluorescent protein) in a subset of ganglion cells (B6.Cg-Tg(Thy1-  
102 YFP)HJrs/J) were obtained from the Jackson Laboratory (Bar Harbor, ME).

103

104 *Oxygen-induced Retinopathy*- Pre-weanling litters were housed in 75% oxygen for five  
105 days, as per Smith et al. (1993), from post-natal age P7 to P12. Litters were then returned to  
106 room air. This exposure window was late enough to minimize dilation effects on the  
107 regressing hyaloid vessels, and early enough to overlap with retinal vascular development.  
108 A maximal neovascularization response occurs in this model between age P17 and P21.

109

110 *Micron-III system imaging and Focal-ERG* – Focal-ERG analysis was completed in the  
111 Pediatric Retinal Research Laboratory's retinal imaging and ERG suite, at the Eye Research  
112 Institute of Oakland University. The suite was equipped with variable dim red lighting (4-15  
113 Lux) for working on dark-adapted rodents. Focal-ERG recordings were from dark-adapted  
114 mice using a Micron-III camera-mounted focal-ERG system (Phoenix Research Labs,  
115 Pleasanton CA). See **Figure 1**. After 1.5-hours of dark adaption in the suite's dark housing  
116 station, pupils of mice were dilated with sequential application of tropicamide and  
117 phenylephrine eye drops. To achieve a brief anesthesia (30 minutes), mice received a single  
118 injection (IP) of 50 mg/kg Ketamine HCl and 7 mg/kg Xylazine. After loss of the blinking  
119 reflex, eyes were protected by Goniovisc corneal protectant gel solution. This solution  
120 provided optical coupling to the lens of the focal ERG attachment, and provided low  
121 impedance for electrical coupling to a gold-plated lens-mount, which served as the  
122 measuring electrode.

**Figure 1. Micron-III System, Pediatric Retinal Research Lab, Eye Research Institute, Oakland University.**

**A)** Focal ERG work-station. **B)** Micron-II camera with focal-ERG attachment and electrode interface. **C)** Focal-ERG attachment illumination targeting controls. **D)** Mouse warming support.

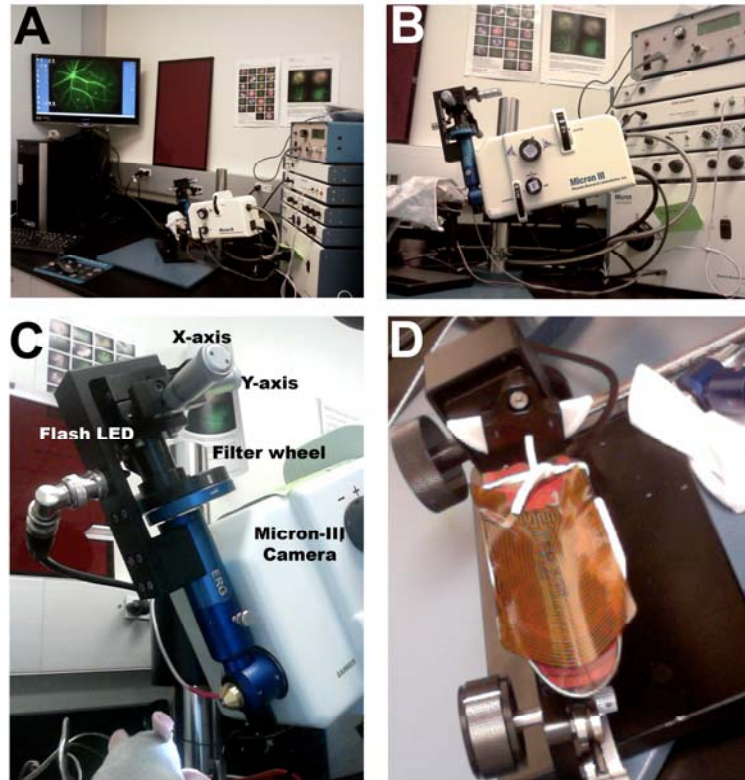

123 The mouse support included a thermal heating pad set for 37°C, which was necessary to  
124 avoid temperature loss under anesthesia. Aiming of the light stimulus was accomplished by  
125 viewing the retina with dim red-filtered LED illumination, high camera gain, and a 15-frame  
126 video averaging. (Otherwise not visible to the naked eye.) A small circular LED white-light  
127 stimulus just larger than the optic disc was projected to stimulate four positions around and  
128 adjacent to the optic disc (30 msec duration) with a bright intensity setting corresponded to  
129 an energy delivery of 43,775 cd-sec/m<sup>2</sup> of projected retinal area, sufficient to elicit a  
130 maximum mixed cone-rod response. The stimulus spot diameter was 0.27 mm, area 0.057  
131 mm<sup>2</sup>. The Micron-III focal-ERG had a high luminous efficiency cool-white LZ1-00CW00  
132 LED (LED Engin, San Jose, CA) with emission from 430-650 nm. Platinum cutaneous  
133 needle-electrodes were used for the reference and ground, inserted into head-cap and hind-  
134 flank skin respectively. Triggering of the light stimulus and acquisition of the ERG traces  
135 were accomplished with LabScribe2 software equipped with the Phoenix Research Lab  
136 ERG module. Twenty stimulus traces were averaged to obtain the ERG trace, with a 100  
137 msec delay between acquisition cycles. Band pass was set to range from 0.5 Hz to 2000 Hz  
138 and digitization rate was 5000 Hz.

139 Focal-ERG data were collected by targeting the same central retinal locations of the same  
140 eyes at three different ages: P21, P28 and P42. **Figure 2** illustrates the initial identification  
141 of the disc in an eye (left eye). The same spot was then decreased in size, in this case a spot  
142 size selection was fixed to a diameter of 0.27 mm, which was just larger than the optic disc  
143 itself (**Figure 2B**). This target size was used in continuous red-light mode to visualize  
144 placement into the desired target region, relative to the disc. Just prior to acquisition, the  
145 focal-ERG system was switched to flash illumination mode and the red filter removed for  
146 full white LED stimulation. Then ERG recordings were obtained in regions around the disc  
147 in the order: temporal, nasal, superior and inferior to the disc.

**Fig 2. Focal-ERG Targeting Process of the dark-adapted retina.** Images shown were obtained during acquisition of the P42 Oxygen-treated focal-ERG data shown in Figure-5. A) Dim red-light illumination, not visible to the naked eye, was used to visualize the optic disc by with high camera gain and 15-frame high-speed image summation. B) The illumination spot size was then reduced for targeting a circular area of 0.06 mm<sup>2</sup>, just larger than the disc itself. For illustration purposes, the disc location is marked with a white cross. C) An example of targeting nasal to the disc, left eye. D) Example, targeting superior to the disc, same eye.

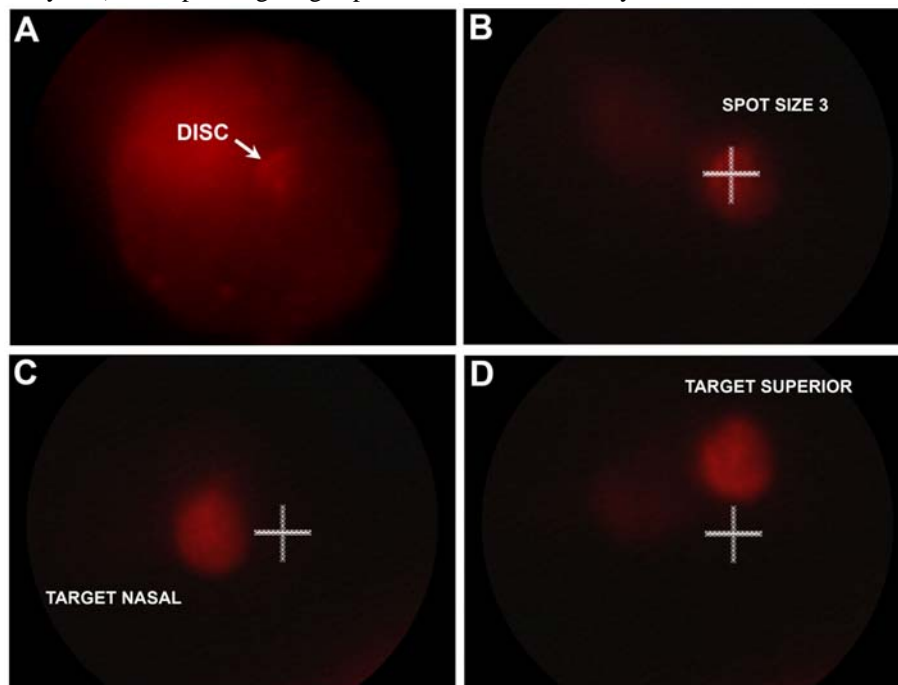

148

149 By using this targeting scheme, the same central regions (damaged by OIR), could be re-  
150 tested, longitudinally, in the same retinas following recovery at ages P21, P28 and P42. A-  
151 wave and B-wave amplitudes from the four locations in the retina were averaged at each age  
152 compared between normal and control retinas by t-test.



153

154 *Spectral Domain Optical Coherence Tomography Analysis (SDOCT)*- Linear B-scans were  
155 obtained using the SD-OCT injector attachment, for the mouse eye, mounted to a Micron-III  
156 Camera System (Phoenix Research Labs, CA). Pupils of mice were dilated with sequential  
157 application of tropicamide and phenylephrine eye drops. To achieve anesthesia (30  
158 minutes), mice received a single injection (IP) of 50 mg/kg Ketamine HCl and 7 mg/kg  
159 Xylazine. Mice received a 50uL injection (IP) of 10mg/mL fluorescein (in saline) to enable  
160 visualization of the retinal vasculature using a fluorescein filter set on the Micron-III  
161 imaging system. Eyes were kept wet using artificial tears. The linear b-scans were targeted  
162 during real time viewing of the retinal vasculature.

163

164 *Virtual Microscopy for Morphology Analysis*: Enucleated whole eyes were fixed in  
165 Davison's fixative. Fixed tissues were processed for paraffin sections and stained with  
166 hematoxylin & eosin. Sections were obtained near the optic nerve region to obtain full  
167 cross-sections of retina (7  $\mu$ m thick) from periphery to periphery. Whole slides were  
168 digitized using a 20x objective lens and an Olympus SL120 Virtual Microscopy Slide  
169 Scanner, and saved in the vsi-file format. Digital files were managed and analyzed using  
170 Leica (Slidepath) Digital Image Hub and Digital Slide Box (DSB) web servers, with the  
171 Safari web browser (Apple, Cupertino, CA).

172

173

174



175  
176  
177  
178  
179  
180  
181  
182  
183  
184  
185  
186  
187  
188  
189  
190  
191  
192  
193

## RESULTS

### *Loss of inner retinal neurons in the central retina of OIR mice.*

Examples of retinal morphology are shown in **Figure-3** for control (room air) and OIR mice using the five-day 75% oxygen treatment model at ages P21, P28 and P42. This confirmed that our model was working as expected. By age P21, regions of INL thinning have resulted due to the loss of bipolar cells during the vascular ablation phase in the model. By P21 neovascular growth has restored oxygen to the central inner retinal zones that were ablated. OIR retinas have central regions of INL (inner nuclear layer) thinning of varied severity. These included complete loss of the INL and ganglion cell layer, as well as regions of transition between zones of extensive bipolar cell loss (vascular ablation regions) and zones of less severe cell loss. In these experiments we did not see any significant loss of photoreceptor cells in the OIR mice compared to room air controls. The ONL (outer nuclear layer) of OIR retinas appeared to maintain the same thickness as their normal air counterparts. As expected the OIR treatment mostly impacted the survival of inner retinal neurons that died during the period of hypoxia.

194

**Figure 3. Erosion of the INL and GCL in the central retina of the OIR mouse model.**

Light microscopy sections of mouse retinas are shown for normal control (room air) and oxygen-treated mice at the same three ages used for focal-ERG recordings, illustrating that ablation of the retinal vasculature during the 75% oxygen treatment results in a varied amount of bipolar cell loss by age P21. Some examples of thinning of the inner nuclear layer and transition to regions of near normal looking retina are shown at ages P21, P28 and P42. Regions of bipolar cell loss are evident (white arrows). Some retinal regions are severely affected to the point where ganglion cell density is also decreased (black arrow). The peripheral retina is generally spared. (RPE - Retinal pigment epithelium; IS/OS – Inner and Outer Segments; ONL – outer Nuclear Layer; INL – Inner Nuclear Layer; GCL – Ganglion cell layer)

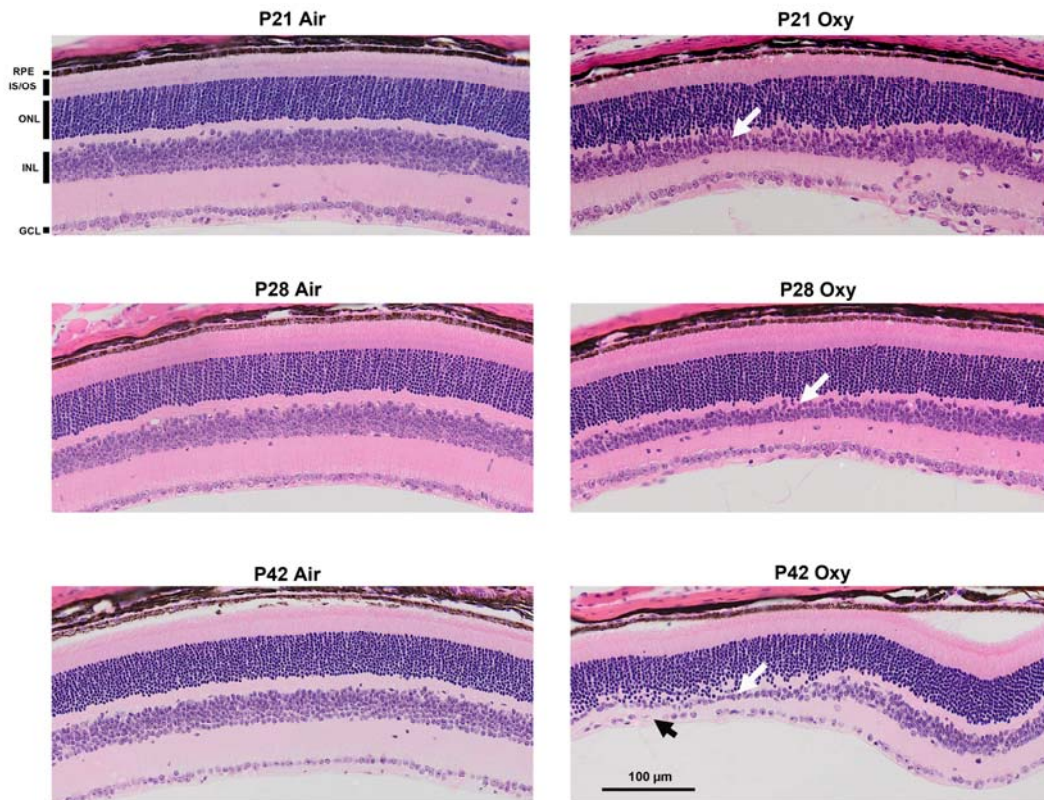

195

196 *Focal ERG B-wave intensity in areas of different INL thickness*

197 To demonstrate that we can use focal-ERG testing of different small areas within the same  
198 retina without excessive interference from more peripheral retina areas, we used SD-OCT to  
199 map zones of different INL thickness un an OIR retina to select discrete targets for  
200 stimulation and recording of the ERG. The loss of bipolar cells and thus INL thinning was  
201 expected to be more severe in central regions of vascular ablation compared to central

202 regions that do not experience vessel ablation. This was confirmed by imaging the same  
203 retina on two different days using fluorescein angiography guided SD-OCT. Live image  
204 guided SD-OCT shows the retinal layers in an central zone that was ablated of retinal  
205 vessels as well as an adjacent region that was not ablated at age P18. (See Figure 4A,C) By  
206 age P23, after revascularization, the formerly ablated zone had a relatively thinner INL  
207 (Figure 4B,D).  
208

**Figure 4. Relation of central avascular zones to INL thinning.** INL thinning is more severe in central avascular zones. SD-OCT imaging of the same OIR retina at ages P18 and P23. SD-OCT scans were taken, in the direction of the red arrows, within the period of aggressive neovascularization at age P18 and at age P23 after resolution of vascular regrowth. **A)** At age P18, a linear OCT scan location was selected using fluorescein-angiography guided-imaging to compare an avascular zone (start of scan) transition into a vascular zone. Some fluorescein image image-blur was apparent, from imaging through perfused vessels that are still present on the lens posterior. **B)** The same retina subjected to a repeated OCT linear scan at age P23 after revascularization of the central retina avascular zones. **C)** The OCT image at age P18, corresponding to the location shown above in panel A. **D)** OCT image at age P23, corresponding to the location shown above in panel B.

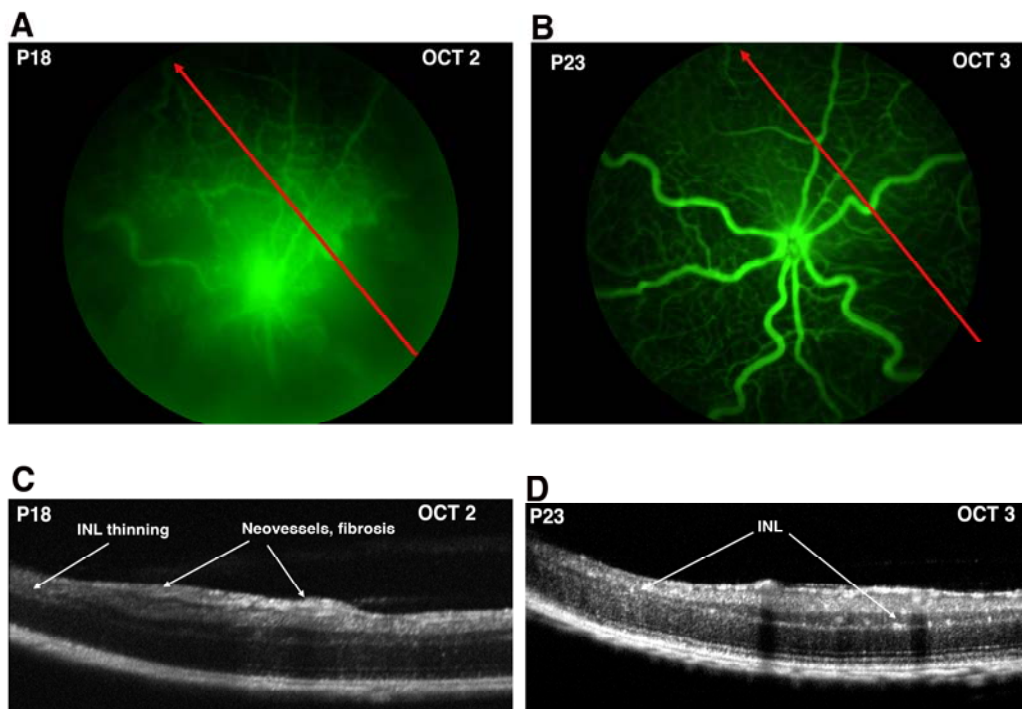

209

210

211 This same retina was also mapped in more detail at age P23 with several SD-OCT scans to  
212 locate central zones with relatively thinner or thicker INL. (Figure 5A) Based on this  
213 information the same retina was tested by focal-ERG at age P37 to compare two zones of  
214 relatively thinner INL to two zones with relatively thicker INL at the same distance from the  
215 disc (Figure 5B).

216

**Figure 5. Local variations in B-wave amplitude detected relative to surviving INL thickness.**

The same retina shown in Figure-3 was mapped by SD-OCT to identify locations of relatively thinner and thicker INL for functional comparison. **A)** To establish that the focal-ERG stimulation can compare B-wave intensity in small adjacent regions with different amounts of bipolar cell loss after oxygen-induced retinopathy (OIR), an OIR retina P23) was first mapped using SD-OCT with linear scans (1.4 mm long). Scans were placed precisely during live imaging with fluorescein angiography. Extensive bipolar cell loss was visible in all OCT scans of the central retina. SD-OCT scan directions are indicated by lines with arrows and the line colors (red, green, blue) correspond to the OCT images in the same colored boxes to the right. The start of each scan corresponds to the left-side of the OCT image. An example of a relatively thinner INL layer with more extensive bipolar cell loss is indicated (white arrow) in the topmost scan (red).

**B)** In a follow up session (age P37) four small circular areas of equal distance from the optic disc were targeted for focal-ERG. Bright flashes were used to elicit a mixed rod-cone response using circular projected light flashes of actual size shown by the numbered red circles (0.27 mm diameter). Targets 1 and 2 were selected to represent regions of relatively thinner INL compared to target regions 3 and 4. **C)** Regions were focal-ERG tested in the relative temporal order 1 to 4. Both regions of relatively thinner and similar INL thickness (targets 1 and 2) had a smaller B-wave amplitude than the relatively thicker regions (targets 3 and 4).

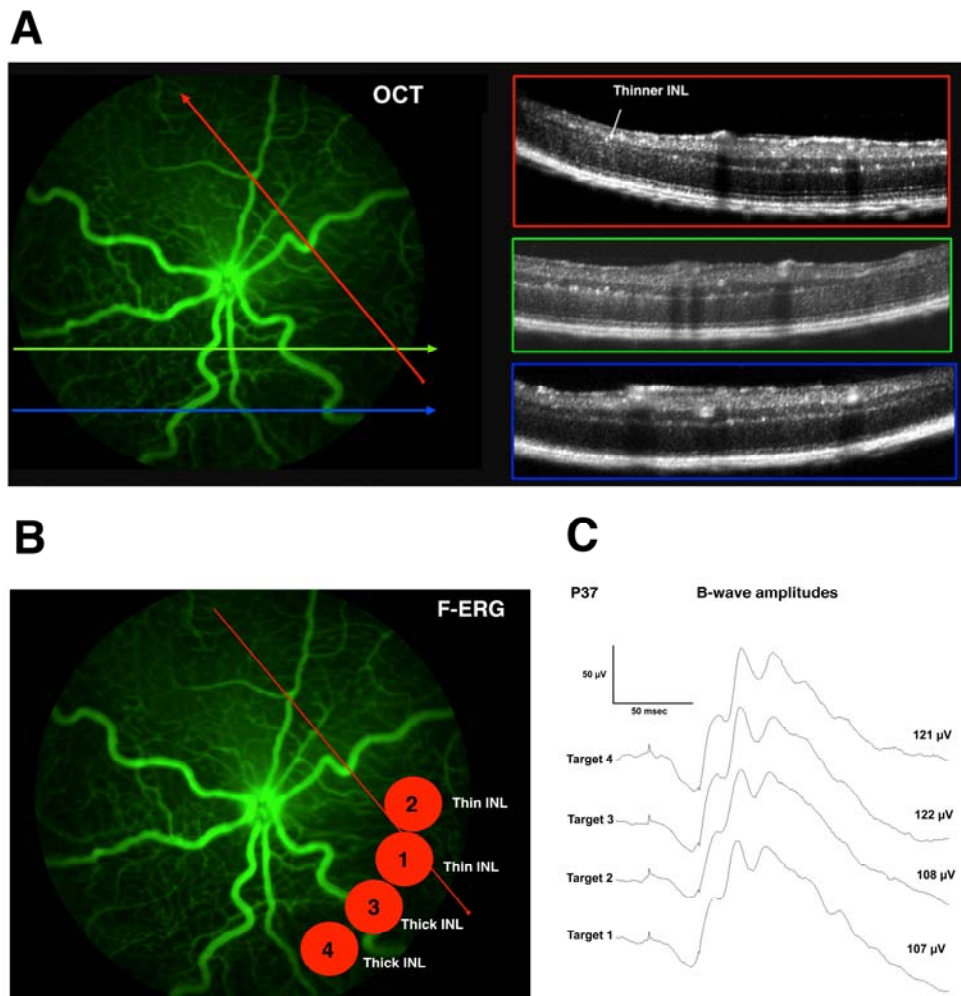

218

219 Focal-ERG recordings were made during the bright flash stimulation (mixed rod-cone  
220 response) and are shown in Figure 5C. Two target regions with relatively thin inner retinas  
221 (labeled 1 and 2) were tested, followed by testing of two regions with relatively thicker  
222 inner retinas (labeled 3 and 4). Targets with thinner inner retinas had similar B-wave  
223 intensities, which were less than the intensities derived from targets with thicker inner  
224 retinas. With the ability to detect differences in B-Wave intensity between regions of  
225 different INL thickness that were essentially adjacent, we concluded that any interference at  
226 a distance would not preclude focal-erg testing of zones that are much further apart, in  
227 completely different retinal quadrants.

228

229 *Local recovery of B-wave in central affected regions of the OIR mouse retina.*

230 To follow functional changes over time in the same retina we followed an OIR retina and a  
231 normal retina over a period of three weeks using image-guided focal-ERG. The same areas  
232 of the same retinas were compared longitudinally starting at age P21, after revascularization  
233 of the central ablated zone that occurs in this model. The fluorescein angiograms of the  
234 retinas followed over three weeks are shown at age P42. (**Figure 6**). This mouse strain had  
235 endogenous expression of the YFP protein in a subset of retinal ganglion cells that are also  
236 visible prior to injection of fluorescein. Figure 6 shows imaging of the retina through the  
237 Focal-ERG's lens using a fluorescein filter set just after the final ERG testing at age P42.  
238 The typical appearance of the normal retinal vasculature was seen in the control retina  
239 (Figure 6A). In contrast the OIR retina displayed the torturous retinal vasculature that is  
240 familiar and characteristic of retinas that have undergone vascular ablation and neovascular  
241 regrowth (Figure 6B).

242



243

**Fig 6. Post-ERG Imaging: Fluorescein Angiography and Ganglion Cells (YFP).** **A)** Normal room-air control retina, age P42. In this strain a subset of ganglion cells are also visible (red arrows) from endogenous yellow fluorescent protein using the standard fluorescein filters. Images were captured using the Micron-III's main light through the focal-ERG lens, immediately after collecting focal-ERG data. **B)** Note the torturous vessel morphology in the OIR retina after neovascularization, age P42.

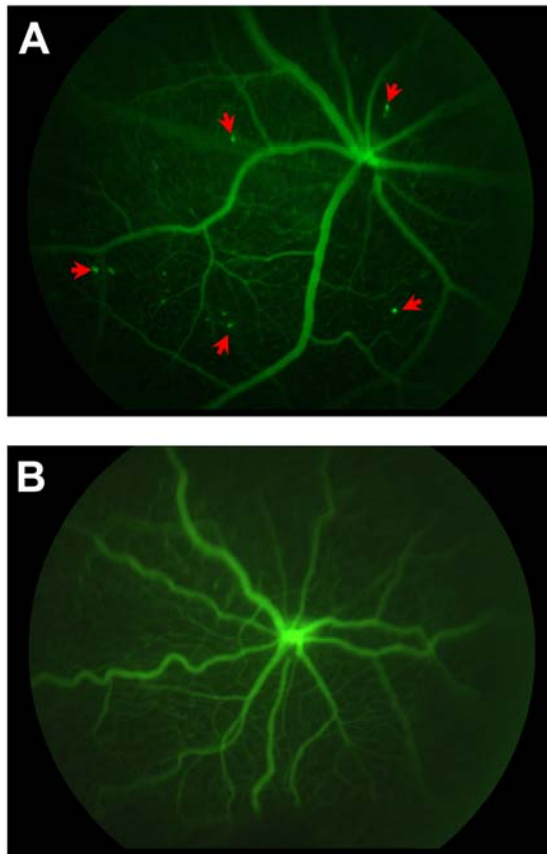

244

245

246

247 Four zones were tested, targeting small circular areas adjacent, but not on, the optic disc.

248 Targets were placed superior, inferior, nasal and temporal around the disc. This targeting

249 process facilitated the testing of the same areas at all three ages for each retina: P21, P28

250 and P42. Focal-ERG traces from the four locations of a normal room air (control) retina and

251 an OIR damaged retina are shown in **Figure-7**.

252



253 Just after revascularization at P21, a very weak B-wave (average 21.9 mV) was seen  
 254 in all four tested zones of the OIR damaged retina. In comparison, the focal-ERG B-wave  
 255 amplitudes of a normal retina at age P21 were 10-fold larger (t-test,  $P < 0.0001$ ). See **Table-**  
 256 **1**. The normal retina focal-ERG B-wave traces also displayed familiar oscillatory potentials  
 257 as normally seen with full-field ERG. (**Figure-7**) The weak focal-ERG B-waves of the OIR  
 258 retina did not display oscillatory potentials at age P21. In contrast to the different B-wave  
 259 amplitudes between normal and OIR retinas, the photoreceptor-derived A-wave amplitudes  
 260 were not significantly different between the control and OIR damaged retinas. (Table 1).  
 261

**Table 1: Focal ERG Average A-wave and B-wave Amplitudes (N=4 locations).**

|                   | A-Wave ( $\mu\text{V}$ ) |                 |                 | B-Wave ( $\mu\text{V}$ ) |                  |                  |
|-------------------|--------------------------|-----------------|-----------------|--------------------------|------------------|------------------|
|                   | P21                      | P28             | P42             | P21                      | P28              | P42              |
| Normal Air        | $-24.5 \pm 9.2$          | $-26.0 \pm 6.9$ | $-20.1 \pm 4.9$ | $221.7 \pm 37.2$         | $232.2 \pm 27.9$ | $195.6 \pm 29.2$ |
| OIR               | $-31.3 \pm 7.7$          | $-22.3 \pm 5.2$ | $-16.6 \pm 4.5$ | $21.9 \pm 16.4$          | $40.4 \pm 13.7$  | $80.9 \pm 37.4$  |
| P-value<br>T-test | 0.15                     | 0.21            | 0.16            | $<0.0001$                | $<0.0001$        | $<0.005$         |

262  
 263 Continuing to compare the focal ERG amplitudes at ages P28 and P42, there was a  
 264 visible recovery of the B-wave amplitude in the OIR central retinal zones over a three-week  
 265 span. (**Figure-7**). By age P42 the B-wave amplitudes at each zone tested also began to  
 266 develop characteristic oscillatory potentials characteristic of retinas with interconnected  
 267 inner retinal neurons. The local improvement in average focal-ERG B-wave amplitude by  
 268 age P42 was substantial, about 4-fold greater than that seen at age P21. However, this  
 269 recovered B-wave amplitude was only 41% of the average B-wave amplitude of an age  
 270 matched normal retina. In contrast to the lost and recovery of the central retina derived B-  
 271 wave response, the focal-ERG A-wave amplitudes were not different between the OIR and  
 272 normal retinas at any of the ages tested.

273

**Figure 7) Partial recovery of the B-wave in the OIR damaged neural retina.**

Focal-ERG traces of the combined rod-cone response were obtained using bright flashes of the same four locations in of the same retinas, followed at three different ages: P21, P28 and P42. The control and OIR retinas were tested in the same sessions on the same day. ERG traces from the four locations around the central retina are shown: superior, inferior, nasal and peripheral (relative to the disc). All four locations in the normal retina displayed a normal looking ERG pattern with A-wave, B-wave and oscillatory potentials. In the OIR damaged retina, at P21 the A-wave could be detected with very little B-wave response. Longitudinal analysis of the same retina areas repeated at ages P28 and P42 revealed a gradual appearance and improvement of the B-wave amplitude in the OIR damaged retina, including some oscillatory potentials.

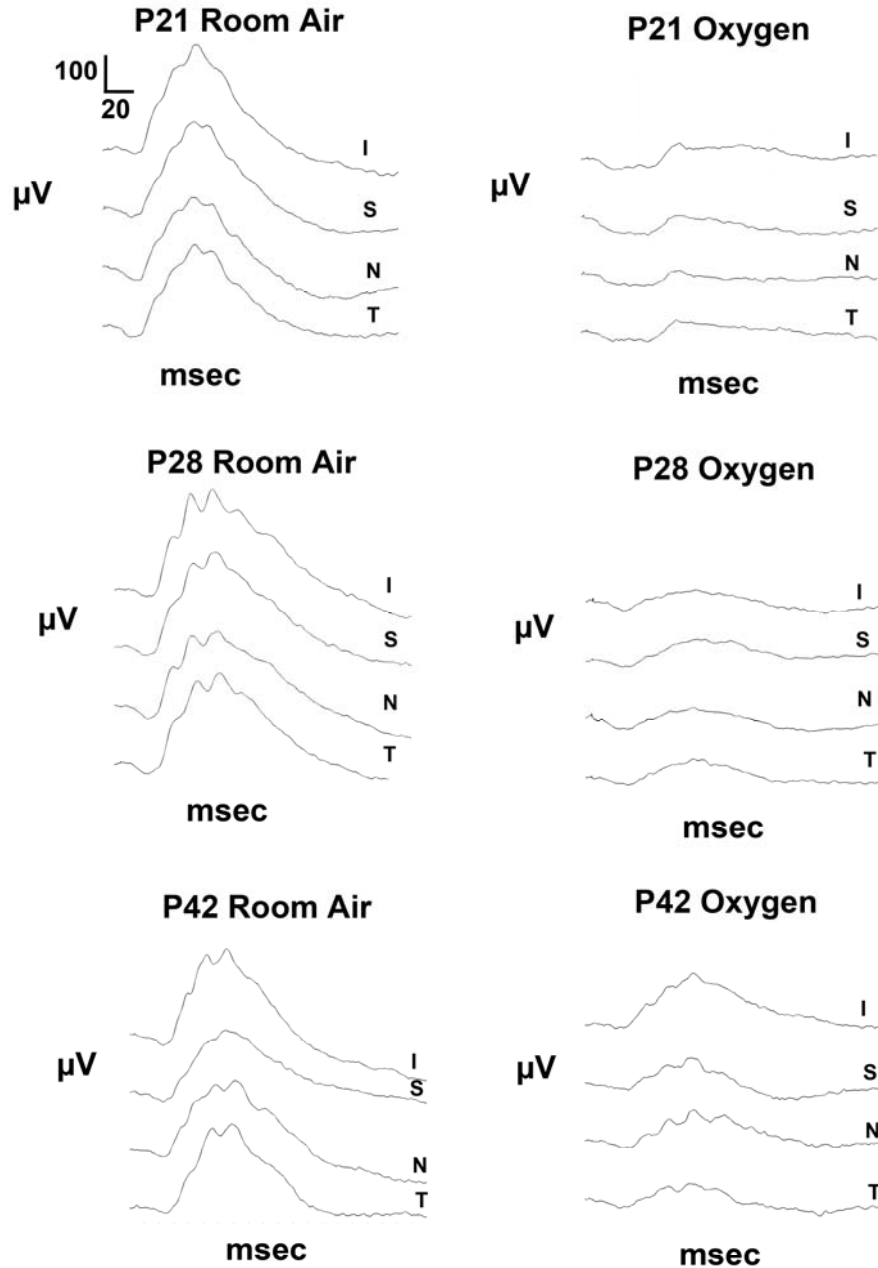

274 **DISCUSSION**

275 The mouse OIR model is useful to produce ischemic retinal areas *in vivo*, which results in  
276 neovascular regrowth when the mice are returned to a normal air environment. As such, the  
277 model is useful to study the pathophysiology of inner retinal neuron loss during ischemia, as  
278 well as the regulation of subsequent neovascular growth [3, 11]. For our investigation here,  
279 we focused on the phase subsequent to neovascularization to look for evidence of any local  
280 recovery of inner retinal function. With focal-ERG, we limited the light-flash stimulation to  
281 extremely small retinal zones that were just larger than the disc. This enabled us to test the  
282 function of the inner retina in the OIR-damaged area, based on the ERG B-wave response  
283 that is dominated by bipolar cell depolarization [14]. While other human, rat and mouse  
284 studies provide good evidence that there is an overall average recovery of post-  
285 photoreceptor function [6, 8, 10], our use of focal-ERG stimulation to longitudinally  
286 monitor the same small retinal areas of an OIR retina over a period of several weeks suggest  
287 that recovery can take place in regions that have suffered OIR induced damage.

288 In the normal mouse retina, the focal-ERG A- and B-wave amplitudes are generally  
289 less than when stimulating the entire retinal area (full-field ERG), but the ERG features are  
290 familiar and similar in pattern to that of the full-field ERG. A-wave, B-wave and oscillatory  
291 potentials were clearly derived and reproducible using the time averaging of twenty traces  
292 per area tested. Quite small retinal areas (0.27 mm diameter) were tested close to the disc, to  
293 ensure the targeting of central retinal regions that experienced vascular ablation. These same  
294 regions experienced bipolar cell loss during the ischemia phase of the model that resulted  
295 after 75% oxygen-treated mice were returned to room air (21% oxygen). It is established by  
296 other laboratories, and our own, that aggressive neovascular growth returns the inner  
297 retina's blood supply by age P21 [3, 12, 13]. We wanted to investigate the functional status  
298 of these central OIR damaged retinal zones from age P21 onward. With the substantial death  
299 of bipolar cells during the ischemic phase, would the OIR damaged retina areas function at  
300 age P21, compared to the normal? Subsequently, would the function of these damaged  
301 zones remain the same or recovery over the next several weeks?

302 From histology and OCT we concluded that most of the cell death in the OIR  
303 damaged central retinal zones involved the inner retina, seen as a reduction in the INL

304 thickness. In contrast the ONL remained a normal thickness (10-12 photoreceptor nuclei)  
305 even in regions where almost all bipolar neurons were lost (Figure 3). This reflects the fact  
306 that photoreceptor cell inner-segments, and their oxygen-demanding mitochondria, are  
307 adjacent to the RPE/choroid and the choroid's blood supply. Thus, photoreceptors cells are  
308 less reliant on the three vascular beds of the inner retina, which were ablated during the 75%  
309 oxygen treatment phase. This was consistent with the near normal A-wave amplitude seen in  
310 OIR damaged central retinal zones when compared to room-air control central retinal zones.  
311 Photoreceptors remained normal in number and functionally mature enough to respond to  
312 light stimulation and generate a negative A-wave of similar amplitude to the normal retina.

313 Consistent with the loss of bipolar cells, the central retinal B-wave amplitudes were  
314 substantially reduced and abnormal in their pattern at age P21 in the OIR retina. At P21 the  
315 B-wave was essentially decimated. Furthermore, longitudinal follow-up of the same local  
316 central zones at ages P28 and P42 revealed a progressive and significant recovery of the B-  
317 wave amplitude. The recovery of familiar oscillatory potentials superimposed on the B-  
318 wave was also apparent in the OIR focal-ERG by age P42.

319 Our results suggest that there was a non-functional inner retina at age P21  
320 immediately after the loss of bipolar cells and that these damaged central retinal zones  
321 demonstrated a local recovery of inner-retinal function by establishing their functionality.  
322 This was seen in the local recovery of the B-wave amplitude. However, the recovered B-  
323 wave amplitude at age P42 remained less than seen in a normal retina with full compliant  
324 bipolar cells. One implication of these results is that any surviving inner retina neurons do  
325 have the ability to recover function over time. This might involve physical reorganization  
326 [9](i.e. synaptogenesis) and also a metabolic recovery from pan-retinal changes in energetics  
327 and ion regulation[15].

328 Regarding human conditions involving ischemic retinal neuron loss, such as ROP, our  
329 results suggest that any treatments that improve bipolar cell survival would result in an  
330 overall improvement in the final retinal function. Thus, such treatments, even if not perfect,  
331 would be worthwhile. Finally, the use of focal-ERG combined with imaging technologies,  
332 such as angiography, and SD-OCT provided us with the ability to explore retinal function in  
333 more detail than we could previously. Multiple combined imaging and focal-ERG testing,  
334 with image guided targeting, could provide an expanded range of non-invasive diagnostic

335 tools for more detailed understanding of retinal pathologies in the human eye *in vivo*.

336

### 337 **Acknowledgments**

338 Research Support: Vision Research ROPARD Foundation, (Virginia and Clarence Clohset  
339 estate) to KPM and KD. Oakland University Center for Biomedical Research to KPM.  
340 Special Trustees of Moorsfields Eye Hospital, National Institute of Health Biomedical  
341 Research Center at Moorsfields Eye Hospital, UCL Institute of Ophthalmology, TFC Frost  
342 Trust, HCA International, and Moorsfields Surgeons Association for visiting fellowship to  
343 SCW. Authors acknowledge Jennifer Felisky, OU student, for assistance in manuscript  
344 submission and reviewing.

345

### 346 **References**

- 347 1. Gole GA, Browning J, Elts SM. The mouse model of oxygen-induced retinopathy: A  
348 suitable animal model for angiogenesis research. *Doc Ophthalmol*. 1990; **74**:163-9.
- 349 2. Ricci B. Oxygen-induced retinopathy in the rat model. *Doc Ophthalmol*. 1990; **74**:171-7.
- 350 3. Smith LE, Wesolowski E, McLellan A, et al. Oxygen-induced retinopathy in the mouse.  
351 *Invest Ophthalmol Vis Sci*. 1994; **35**:101-11.
- 352 4. Krohne TU, Westenskow PD, Kurihara T, et al. Generation of retinal pigment epithelial  
353 cells from small molecules and oct4-reprogrammed human induced pluripotent stem  
354 cells. *Paediatr Int Child Health*. 2012; **1**:96-109.
- 355 5. Fulton AB, Hansen RM, Moskowitz A, Akula JD. The neurovascular retina in  
356 retinopathy of prematurity. 2009; **28**:452-82.
- 357 6. Fulton AB, Hansen RM, Moskowitz A. The cone electroretinogram in retinopathy of  
358 prematurity. 2008; **49**:814-9.
- 359 7. Akula JD, Hansen RM, Martinez-Perez ME, Fulton AB. Rod photoreceptor function  
360 predicts blood vessel abnormality in retinopathy of prematurity. 2007; **48**:4351-9.
- 361 8. Fulton AB, Akula JD, Mocko JA, et al. Retinal degenerative and hypoxic ischemic  
362 disease. 2009; **118**:55-61.
- 363 9. Harris ME, Moskowitz A, Fulton AB, Hansen RM. Long-term effects of retinopathy of  
364 prematurity (rop) on rod and rod-driven function. 2011; **122**:19-27.
- 365 10. Nakamura S, Imai S, Ogishima H, et al. Morphological and functional changes in the  
366 retina after chronic oxygen-induced retinopathy. *PLoS One*. 2012; **7**:e32167.
- 367 11. Pierce EA, Avery RL, Foley ED, Aiello LP, Smith LE. Vascular endothelial growth  
368 factor/vascular permeability factor expression in a mouse model of retinal  
369 neovascularization. *Proc Natl Acad Sci U S A*. 1995; **92**:905-9.
- 370 12. Wang L, Shi P, Xu Z, et al. Up-regulation of vegf by retinoic acid during hyperoxia  
371 prevents retinal neovascularization and retinopathy. *Invest Ophthalmol Vis Sci*. 2014;  
372 **55**:4276-87.

- 373 13. Tokunaga CC, Mitton KP, Dailey W, et al. Effect of anti-vegf treatment on developing  
374 retina following oxygen-induced retinopathy. *Invest Ophthalmol Vis Sci.* 2014; **55**:1884-  
375 1892.
- 376 14. Saszik SM, Robson JG, Frishman LJ. The scotopic threshold response of the dark-  
377 adapted electroretinogram of the mouse. *J Physiol.* 2002; **543**:899-916.
- 378 15. Berkowitz BA, Roberts R. Evidence for a critical role of panretinal pathophysiology in  
379 experimental rop. 2010; **120**:13-24.
- 380  
381  
382
